# Supplementary material for: A Systematic Review and Critical Assessment of Breast Cancer Risk Prediction Tools Incorporating a Polygenic Risk Score for the General Population
Source: MDPI journal article supplement (doi:10.3390/cancers15225380), 2023-11-12
Supplement: s1 [file s1]

## Supplementary Materials

**Table S1.** Example of search strategy

| Database           | #  | Concept                    | Search strategy                                                                                                                                                                                                                                                                                                                                                       |
|--------------------|----|----------------------------|-----------------------------------------------------------------------------------------------------------------------------------------------------------------------------------------------------------------------------------------------------------------------------------------------------------------------------------------------------------------------|
| Pubmed/<br>MEDLINE | #1 | Breast cancer              | ("Breast Neoplasms"[Mesh]) OR (breast* cancer) OR (breast* cancer[tiab]) OR (breast* tumor) OR (breast* tumor*[tiab]) OR (breast* neoplasm*) OR (breast* neoplasm*[tiab]) OR (breast* carcinoma*) OR (breast* carcinoma*[tiab])                                                                                                                                       |
|                    | #2 | Polygenic risk score (PRS) | ("Multifactorial Inheritance"[Mesh]) OR ("Genetic Predisposition to Disease"[Mesh]) OR (polygenic OR polygenic score*[tiab]) OR (polygenic score*) OR (polygenic risk score*[tiab]) OR (polygenic risk score*) OR (polygenic score*[OT]) OR (polygenic risk score [OT]) OR (polygenic inheritance) OR (multigenic inheritance)                                        |
|                    | #3 | Cancer prediction          | ("Prognosis"[Mesh]) OR ("Early Detection of Cancer"[Mesh]) OR (Cancer prediction) OR (Cancer prediction[tiab]) OR (prediction model*) OR (prediction model*[OT]) OR (prediction model*[tiab]) OR (prediction tool*[OT]) OR (prediction tool*[tiab]) OR (prediction tool*) OR (mathematical model*) OR (cancer probability) OR (cancer likelihood) OR (cancer chance*) |

**Table S2.** Description of risk models and participants

| Author, year                                     | Name of model        | Prediction time                        | Number of cases | Number of controls | Ancestry*                      |
|--------------------------------------------------|----------------------|----------------------------------------|-----------------|--------------------|--------------------------------|
| <b>Models based only on genetic risk factors</b> |                      |                                        |                 |                    |                                |
| Allman, 2015a [43]                               | NA                   | 5-year risk                            | 421             | 7118               | African American               |
| Allman, 2015b [43]                               | NA                   | 5-year risk                            | 147             | 3216               | Hispanic                       |
| Dite, 2016 [48] – ER-positive                    | NA                   | 5-year risk                            | 261             | 856                | European ancestry              |
| Dite, 2016 [48] – ER-negative                    | NA                   | 5-year risk                            | 155             | 856                | European ancestry              |
| Du, 2021 [49] – Overall BC                       | NA                   | Lifetime risk <sup>†</sup>             | 9,241           | 10,193             | African ancestry               |
| Du, 2021 [49] – ER-positive                      | NA                   | Lifetime risk <sup>†</sup>             | 4,299           | 10,193             | African ancestry               |
| Du, 2021 [49] – ER-negative                      | NA                   | Lifetime risk <sup>†</sup>             | 2,636           | 10,193             | African ancestry               |
| Gao, 2022 [67] – Overall BC                      | NA                   | 10-year and lifetime <sup>‡</sup> risk | 9235            | 10,184             | African ancestry               |
| Gao, 2022 [67] – ER-positive                     | NA                   | 10-year and lifetime <sup>‡</sup> risk | 4295            | 10,184             | African ancestry               |
| Gao, 2022 [67] – ER-negative                     | NA                   | 10-year and lifetime <sup>‡</sup> risk | 2635            | 10,184             | African ancestry               |
| Ho, 2020a [50] – Overall BC                      | NA                   | 10-year and lifetime <sup>‡</sup> risk | 15,755          | 16,493             | Asian (Chinese, Indian, Malay) |
| Ho, 2020a [50] – ER-positive                     | NA                   | 10-year and lifetime <sup>‡</sup> risk | 10,477          | 16,483             | Asian (Chinese, Indian, Malay) |
| Ho, 2020a [50] – ER-negative                     | NA                   | 10-year and lifetime <sup>‡</sup> risk | 4,764           | 16,483             | Asian (Chinese, Indian, Malay) |
| Ho, 2020b [50] – Overall BC                      | NA                   | 10-year and lifetime <sup>‡</sup> risk | 1507            | 1212               | Asian American                 |
| Ho, 2020b [50] – ER-positive                     | NA                   | 10-year and lifetime <sup>‡</sup> risk | 1022            | 1212               | Asian American                 |
| Ho, 2020b [50] – ER-negative                     | NA                   | 10-year and lifetime <sup>‡</sup> risk | 280             | 1212               | Asian American                 |
| Ho, 2022a [68]                                   | Validation set       | 10-year and lifetime <sup>‡</sup> risk | 6392            | 6638               | East Asian                     |
| Ho, 2022b [68]                                   | Prospective test set | 10-year and lifetime <sup>‡</sup> risk | 1592            | 89,898             | East Asian                     |
| Ho, 2022c [68]                                   | Validation set       | 10-year and lifetime <sup>‡</sup> risk | 585             | 1018               | South Asian (Indian)           |
| Hou, 2022 [70] – Overall BC                      | Validation set       | 5-year risk                            | 427             | 374                | Asian                          |
| Hou, 2022 [70] – ER-positive                     | Validation set       | 5-year risk                            | 290             | 374                | Asian                          |
| Hou, 2022 [70] – ER-negative                     | Validation set       | 5-year risk                            | 124             | 374                | Asian                          |
| Liu, 2021a [74]                                  | NA                   | Lifetime risk <sup>‡</sup>             | 3960            | 29,634             | European ancestry              |
| Liu, 2021b [74]                                  | NA                   | Lifetime risk <sup>‡</sup>             | 274             | 3,527              | African ancestry               |
| Liu, 2021c [74]                                  | NA                   | Lifetime risk <sup>‡</sup>             | 147             | 2,049              | Latinx ancestry                |
| Mavaddat, 2015 [56]                              | NA                   | 10-year risk                           | 33,673          | 33,381             | European ancestry              |
| Mavaddat, 2019a [12] – Overall BC                | Validation set       | 10-year risk                           | 5,159           | 5,285              | European ancestry              |
| Mavaddat, 2019a [12] – ER-positive               | Validation set       | 10-year risk                           | 4,233           | 5,285              | European ancestry              |
| Mavaddat, 2019a [12] – ER-negative               | Validation set       | 10-year risk                           | 926             | 5,285              | European ancestry              |
| Mavaddat, 2019b [12] – Overall BC                | Prospective test set | 10-year risk                           | 11,428          | 18,323             | European ancestry              |

|                                                                          |                        |                            |                    |                      |                                        |
|--------------------------------------------------------------------------|------------------------|----------------------------|--------------------|----------------------|----------------------------------------|
| Mavaddat, 2019b [12] – ER-positive                                       | Prospective test set   | 10-year risk               | 7,992              | 18,323               | European ancestry                      |
| Mavaddat, 2019b [12] – ER-negative                                       | Prospective test set   | 10-year risk               | 1,259              | 18,323               | European ancestry                      |
| Wen, 2016 [64]                                                           | NA                     | Lifetime risk <sup>†</sup> | 11,905             | 11,662               | East Asian                             |
| Yang X., 2022 [23]                                                       | NA                     | 5-year risk                | 676                | 15,502               | European ancestry                      |
| Yang Y., 2022a [72]                                                      | Validation set         | 10-year risk               | 1426               | 1323                 | Asian                                  |
| Yang Y., 2022b [72]                                                      | Prospective set        | 10-year risk               | 368                | 736                  | Asian                                  |
| <b>Models based on genetic risk factors and non-genetic risk factors</b> |                        |                            |                    |                      |                                        |
| Allman, 2015c [43]                                                       | BCRAT                  | 5-year risk                | 421                | 7118                 | African American                       |
| Allman, 2015d [43]                                                       | IBIS                   | 5-year risk                | 421                | 7118                 | African American                       |
| Allman, 2015e [43]                                                       | BCRAT                  | 5-year risk                | 147                | 3216                 | Hispanic                               |
| Allman, 2015f [43]                                                       | IBIS                   | 5-year risk                | 147                | 3216                 | Hispanic                               |
| Allman, 2021a [44]                                                       | Streamlined Gail model | 5-year risk                | 416                | 7005                 | African American                       |
| Allman, 2021b [44]                                                       | Streamlined Gail model | 5-year risk                | 750                | 405                  | European ancestry                      |
| Allman, 2021c [44]                                                       | Streamlined Gail model | 5-year risk                | 147                | 3,210                | Hispanic                               |
| Brentnall, 2020 [45] – Overall BC                                        | Tyrer-Cuzick v6        | 10-year risk               | 405                | 1,668                | European ancestry                      |
| Brentnall, 2020 [45] – ER-positive                                       | Tyrer-Cuzick v6        | 10-year risk               | 353                | 1,668                | European ancestry                      |
| Brentnall, 2020 [45] – ER-negative                                       | Tyrer-Cuzick v6        | 10-year risk               | 39                 | 1,668                | European ancestry                      |
| Darabi, 2012 [46]                                                        | Gail model             | 5-year risk                | 1017               | 856                  | European ancestry                      |
| Dite, 2013** [47] – Overall BC                                           | BCRAT                  | 5-year risk                | 962 <sup>a</sup>   | 463 <sup>b</sup>     | European ancestry                      |
| Dite, 2013 [47] – ER-positive                                            | BCRAT                  | 5-year risk                | 298                | 463                  | European ancestry                      |
| Dite, 2013 [47] – ER-negative                                            | BCRAT                  | 5-year risk                | 151                | 463                  | European ancestry                      |
| Dite, 2016a [48]                                                         | BOADICEA               | 5-year risk                | 750                | 405                  | European ancestry                      |
| Dite, 2016b [48]                                                         | BRCAPRO                | 5-year risk                | 750                | 405                  | European ancestry                      |
| Dite, 2016c [48]                                                         | BCRAT                  | 5-year risk                | 750                | 405                  | European ancestry                      |
| Dite, 2016d [48]                                                         | IBIS                   | 5-year risk                | 750                | 405                  | European ancestry                      |
| Eriksson, 2020 [66]                                                      | NA                     | 2-year risk                | 974                | 9,376                | European ancestry                      |
| Evans, 2022 [69]                                                         | Tyrer-Cuzick v8        | 10-year risk               | 340                | 1410                 | European ancestry                      |
| Hou, 2022b [70] – Overall BC                                             | NA                     | 5-year risk                | 431                | 376                  | Asian                                  |
| Hou, 2022b [70] – ER-positive                                            | NA                     | 5-year risk                | 290                | 374                  | Asian                                  |
| Hou, 2022b [70] – ER-negative                                            | NA                     | 5-year risk                | 124                | 374                  | Asian                                  |
| Hou, 2022c [70] – Overall BC                                             | Gail-2                 | 5-year risk                | 431                | 376                  | Asian                                  |
| Hou, 2022c [70] – ER-positive                                            | Gail-2                 | 5-year risk                | 290                | 374                  | Asian                                  |
| Hou, 2022c [70] – ER-negative                                            | Gail-2                 | 5-year risk                | 124                | 374                  | Asian                                  |
| Hurson, 2021** [51]                                                      | iCARE-Lit              | 5-year risk                | 6,811 <sup>c</sup> | 286,801 <sup>d</sup> | European ancestry                      |
| Husing, 2012 [52] – Overall BC                                           | BCRAT                  | 5-year risk                | 6,009              | 7,827                | European ancestry                      |
| Husing, 2012 [52] – ER-positive                                          | BCRAT                  | 5-year risk                | 3,920              | 7,827                | European ancestry                      |
| Husing, 2012 [52] – ER-negative                                          | BCRAT                  | 5-year risk                | 1,059              | 7,827                | European ancestry                      |
| Jantzen, 2021a [53]                                                      | BCRAT                  | 5-year risk                | 131                | 4,424                | European ancestry                      |
| Jantzen, 2021b [53]                                                      | IBIS V.8.0b            | 5-year risk                | 131                | 4,424                | European ancestry                      |
| Jia, 2020 [75]                                                           | NA                     | 5-year risk                | 4,340              | 210,096              | European ancestry                      |
| Lakeman, 2020 [24]                                                       | BOADICEA v5            | 10-year risk               | 320                | 6,202                | European ancestry                      |
| Lee, 2015 [54]                                                           | Gail model             | 10-year risk               | 680                | 23,481               | Asian (Chinese, Indian, Malay, Others) |
| Li, 2021a** [73]                                                         | BOADICEA               | 5-year and 10-year risk    | 408 <sup>e</sup>   | 3,098 <sup>f</sup>   | European ancestry                      |
| Li, 2021b** [73]                                                         | IBIS                   | 5-year and 10-year risk    | 408 <sup>e</sup>   | 3,098 <sup>f</sup>   | European ancestry                      |

|                               |                  |                                             |                  |                     |                                            |
|-------------------------------|------------------|---------------------------------------------|------------------|---------------------|--------------------------------------------|
| Maas, 2016 [55]               | NA               | Lifetime risk <sup>‡</sup>                  | 17,171           | 19,862              | European ancestry                          |
| Mealiffe, 2010 [57]           | Gail model       | 5-year risk                                 | 1,664            | 1,636               | European ancestry                          |
| Olsen, 2021 [71]              | NA               | 3 and 5-year risk                           | 185              | 30,127              | European ancestry                          |
| Pal Choudhury, 2020a** [58]   | iCARE-Lit        | 5-year risk                                 | 863 <sup>g</sup> | 63,148 <sup>h</sup> | European ancestry                          |
| Pal Choudhury, 2020b** [58]   | iCARE-BPC3       | 5-year risk                                 | 863 <sup>g</sup> | 63,148 <sup>h</sup> | European ancestry                          |
| Pal Choudhury, 2020c** [58]   | BCRAT            | 5-year risk                                 | 863 <sup>g</sup> | 63,148 <sup>h</sup> | European ancestry                          |
| Pal Choudhury, 2020d** [58]   | IBIS             | 5-year risk                                 | 863 <sup>g</sup> | 63,148 <sup>h</sup> | European ancestry                          |
| Pal Choudhury, 2021a** [25]   | BOADICEA v.5     | 5-year risk                                 | 619 <sup>i</sup> | 718 <sup>j</sup>    | European ancestry                          |
| Pal Choudhury, 2021b** [25]   | Tyrer-Cuzick v.8 | 5-year risk                                 | 619 <sup>i</sup> | 718 <sup>j</sup>    | European ancestry                          |
| Shieh, 2016a [59]             | BCSC v2          | 5-year risk                                 | 448              | 448                 | European ancestry, East Asian and Hispanic |
| Shieh, 2016b [59]             | BCSC v2          | 5-year risk                                 | 387              | 387                 | European ancestry                          |
| Shieh, 2016c [59]             | BCSC v2          | 5-year risk                                 | 51               | 51                  | East Asian                                 |
| Shieh, 2017 [60]              | BCSC             | 5-year risk                                 | 110              | 214                 | European ancestry                          |
| Starlard-Davenport, 2018 [61] | BCRAT            | 5-year risk and lifetime risk <sup>++</sup> | 319              | 559                 | African American                           |
| Vachon, 2015 [63]             | BCSC             | 5-year risk                                 | 456              | 1166                | European ancestry                          |
| van Veen, 2018 [62]           | Tyrer-Cuzick v6  | 10-year risk                                | 466              | 8897                | European ancestry                          |
| Yang X., 2022 [23]            | BOADICEA V.6     | 5-year risk                                 | 280              | 5693                | European ancestry                          |
| Yang Y., 2022b [72]           | Prospective set  | 10-year risk                                | 368              | 736                 | Asian                                      |
| Zheng, 2010 [65]              | NA               | 10-year risk                                | 3039             | 3082                | Asian                                      |

**Abbreviations:** BCSC = Breast Cancer Surveillance Consortium; BPC3 = Breast and Prostate Cancer Cohort Consortium; BOADICEA = Breast and Ovarian Analysis of Disease Incidence and Carrier Estimation Algorithm; BCRAT = Breast Cancer Risk Assessment Tool (Gail Model); IBIS = International Breast Intervention Study (Tyrer-Cuzick model); iCARE-Lit = Individualized Coherent Absolute Risk Estimator based on literature review; iCARE-BPC3 = Individualized Coherent Absolute Risk Estimator based on BPC3 analysis

**Notes:** A streamlined model includes first degree family history and age; NA indicates that the model was not based on a pre-existing tool

\* Indicates the most prevalent ancestry group on which the PRS was derived;

\*\* Models are presented stratified by age groups.

<sup>†</sup> Lifetime risk is an estimated risk until the age of 85; <sup>++</sup> Lifetime risk is an estimated risk until the age of 90;

<sup>‡</sup> Lifetime risk is an estimated risk until the age of 80;

<sup>a</sup> = 333, 332 and 307 cases were aged 35 to 39, 40 to 49 and 50 to 59, respectively; <sup>b</sup> = 182, 151 and 130 non cases were aged 35 to 39, 40 to 49 and 50 to 59, respectively; <sup>c</sup> = 891 cases were aged <50 and 5,920 were aged ≥50; <sup>d</sup> = 54,058 non cases were aged <50 and 232,743 were aged ≥50; <sup>e</sup> = 235 cases were aged <65 and 173 were age ≥65; <sup>f</sup> = 1,732 controls were aged <65 and 1,366 were age ≥65; <sup>g</sup> = 263 cases were aged <50 and 598 were aged ≥50; <sup>h</sup> = 27,967 non cases were aged <50 and 36,044 were aged ≥50; <sup>i</sup> = 207 cases were aged <50 and 412 were aged ≥50; <sup>j</sup> = 233 non cases were aged <50 and 485 were aged ≥50.

**Table S3.** Predictive performance of models in individual studies

| Author, year                                      | Measure of discrimination | Discriminative ability (95% CI) | Calibration               | Reclassification (95% CI) |
|---------------------------------------------------|---------------------------|---------------------------------|---------------------------|---------------------------|
| <b>Models based on genetic risk factors alone</b> |                           |                                 |                           |                           |
| Allman, 2015a [43]                                | AUC                       | 0.550 (0.530 – 0.580)           | $\chi^2 = 6.0, P = 0.6$   |                           |
| Allman, 2015b [43]                                | AUC                       | 0.590 (0.540 – 0.640)           | $\chi^2 = 20.8, P = 0.01$ |                           |
| Allman, 2021a [44]                                | AUC                       | 0.550 (0.525 – 0.584)           | NA                        |                           |
| Allman, 2021b [44]                                | AUC                       | 0.612 (0.597 – 0.646)           | NA                        |                           |
| Allman, 2021c [44]                                | AUC                       | 0.590 (0.543 – 0.636)           | NA                        |                           |
| Darabi, 2012 [46]                                 | AUC                       | 0.589 (0.563 – 0.614)           | NA                        |                           |
| Dite, 2013 [47] – All ages                        | AUC                       | 0.580 (0.540 – 0.610)           | $\chi^2 = 7.27, P = 0.5$  |                           |
| Dite, 2013 [47] – 35 to 39                        | AUC                       | 0.600 (0.550 – 0.650)           | $\chi^2 = 12.89, P = 0.1$ |                           |
| Dite, 2013 [47] – 40 to 49                        | AUC                       | 0.580 (0.530 – 0.640)           | $\chi^2 = 10.31, P = 0.2$ |                           |
| Dite, 2013 [47] – 50 to 59                        | AUC                       | 0.540 (0.480 – 0.600)           | $\chi^2 = 3.80, P = 0.9$  |                           |
| Dite, 2016 [48] – Overall BC                      | AUC                       | 0.610 (0.580 – 0.650)           | $\chi^2 = 11.4, P = 0.2$  |                           |
| Dite, 2016 [48] – ER-positive                     | AUC                       | 0.650 (0.610 – 0.690)           | NA                        |                           |
| Dite, 2016 [48] – ER-negative                     | AUC                       | 0.560 (0.500 – 0.620)           | NA                        |                           |
| Du, 2021a [49] – PRS <sub>179</sub> SNPs          | AUC                       | 0.568 (0.560 – 0.576)           | NA                        |                           |
| Du, 2021a [49] – PRS <sub>313</sub> SNPs          | AUC                       | 0.571 (0.562 – 0.579)           | NA                        |                           |
| Du, 2021b [49] – PRS <sub>179</sub> SNPs          | AUC                       | 0.576 (0.566 – 0.585)           | NA                        |                           |
| Du, 2021b [49] – PRS <sub>313</sub> SNPs          | AUC                       | 0.588 (0.577 – 0.599)           | NA                        |                           |
| Du, 2021c [49] – PRS <sub>179</sub> SNPs          | AUC                       | 0.578 (0.564 – 0.591)           | NA                        |                           |
| Du, 2021c [49] – PRS <sub>313</sub> SNPs          | AUC                       | 0.562 (0.551 – 0.573)           | NA                        |                           |
| Eriksson, 2020 [66]                               | AUC                       | 0.640 (0.620 – 0.660)           | NA                        |                           |
| Gao, 2022 [67] – Overall BC                       | AUC                       | 0.581 (0.566 – 0.597)           | NA                        |                           |
| Gao, 2022 [67] – ER-positive                      | AUC                       | 0.608 (0.588 – 0.627)           | NA                        |                           |
| Gao, 2022 [67] – ER-negative                      | AUC                       | 0.576 (0.553 – 0.598)           | NA                        |                           |
| Ho, 2020a [50] – Overall BC                       | AUC                       | 0.613 (NA)                      | NA                        |                           |
| Ho, 2020a [50] – Overall BC (Chinese)             | AUC                       | 0.620 (0.600 – 0.630)           | NA                        |                           |
| Ho, 2020a [50] – Overall BC (Indian)              | AUC                       | 0.600 (0.580 – 0.600)           | NA                        |                           |
| Ho, 2020a [50] – Overall BC (Malay)               | AUC                       | 0.610 (0.590 – 0.640)           | NA                        |                           |
| Ho, 2020a [50] – ER-positive                      | AUC                       | 0.627 (NA)                      | NA                        |                           |
| Ho, 2020a [50] – ER-positive (Chinese)            | AUC                       | 0.630 (0.610 – 0.640)           | NA                        |                           |
| Ho, 2020a [50] – ER-positive (Indian)             | AUC                       | 0.620 (0.600 – 0.650)           | NA                        |                           |
| Ho, 2020a [50] – ER-positive (Malay)              | AUC                       | 0.630 (0.600 – 0.670)           | NA                        |                           |
| Ho, 2020a [50] – ER-negative                      | AUC                       | 0.594 (NA)                      | NA                        |                           |
| Ho, 2020a [50] – ER-negative (Chinese)            | AUC                       | 0.600 (0.580 – 0.610)           | NA                        |                           |
| Ho, 2020a [50] – ER-negative (Indian)             | AUC                       | 0.570 (0.530 – 0.600)           | NA                        |                           |
| Ho, 2020a [50] – ER-negative (Malay)              | AUC                       | 0.590 (0.540 – 0.630)           | NA                        |                           |
| Ho, 2020b [50] – Overall BC                       | AUC                       | 0.577 (NA)                      | NA                        |                           |
| Ho, 2020b [50] – ER-positive                      | AUC                       | 0.586 (NA)                      | NA                        |                           |
| Ho, 2020b [50] – ER-negative                      | AUC                       | 0.587 (NA)                      | NA                        |                           |
| Ho, 2022a [68] – PRS-CSx                          | AUC                       | 0.636 (NA)                      | NA                        |                           |
| Ho, 2022b [68] – PRS-CSx                          | AUC                       | 0.635 (NA)                      | NA                        |                           |

|                                             |             |                       |                                                                       |
|---------------------------------------------|-------------|-----------------------|-----------------------------------------------------------------------|
| Ho, 2022c [68] – PRS-CSx                    | AUC         | 0.633 (NA)            | NA                                                                    |
| Hou, 2022 [70] – Overall BC                 | AUC         | 0.601 (0.562 – 0.640) | E/O = 1.09 (0.77 – 1.41)                                              |
| Hou, 2022 [70] – ER-positive                | AUC         | 0.620 (0.577 – 0.663) | E/O = 1.09 (0.80 – 1.38)                                              |
| Hou, 2022 [70] – ER-negative                | AUC         | 0.555 (0.496 – 0.614) | E/O = 1.23 (0.18 – 2.28)                                              |
| Hurson, 2021 [51] – <50                     | AUC         | 0.631 (0.610 – 0.651) | $\chi^2 = 10.4$ , $P = 0.32$                                          |
| Hurson, 2021 [51] – $\geq 50$               | AUC         | 0.622 (0.614 – 0.630) | $\chi^2 = 11.0$ , $P = 0.27$                                          |
| Husing, 2012 [52] – PRS <sub>7 SNPs</sub>   | AUROC       | 0.564 (0.547 – 0.581) | NA                                                                    |
| Husing, 2012 [52] – PRS <sub>9 SNPs</sub>   | AUROC       | 0.569 (0.552 – 0.586) | NA                                                                    |
| Husing, 2012 [52] – Overall BC              | AUROC       | 0.584 (0.567 – 0.600) | NA                                                                    |
| PRS <sub>18 SNPs</sub>                      |             |                       |                                                                       |
| Husing, 2012 [52] – ER-positive             | AUROC       | 0.595 (0.574 – 0.617) | NA                                                                    |
| PRS <sub>18 SNPs</sub>                      |             |                       |                                                                       |
| Husing, 2012 [52] – ER-negative             | AUROC       | 0.530 (0.492 – 0.567) | NA                                                                    |
| PRS <sub>18 SNPs</sub>                      |             |                       |                                                                       |
| Husing, 2012 [52] – Overall BC              | AUROC       | 0.583 (0.567 – 0.600) | NA                                                                    |
| PRS <sub>32 SNPs</sub>                      |             |                       |                                                                       |
| Husing, 2012 [52] – ER-positive             | AUROC       | 0.596 (0.574 – 0.618) | NA                                                                    |
| PRS <sub>32 SNPs</sub>                      |             |                       |                                                                       |
| Husing, 2012 [52] – ER-negative             | AUROC       | 0.530 (0.493 – 0.568) | NA                                                                    |
| PRS <sub>32 SNPs</sub>                      |             |                       |                                                                       |
| Jantzen, 2021 [53] – PRS <sub>10 SNPs</sub> | c-index     | 0.643 (0.581 – 0.704) | E/O = 0.81 (0.62 – 1.04)<br>$P = 0.2270$ ; Slope = 1.1<br>(0.5 – 1.7) |
| Jantzen, 2021 [53] – PRS <sub>18 SNPs</sub> | c-index     | 0.634 (0.567 – 0.702) | E/O = 0.82 (0.63 – 1.06)<br>$P = 0.1992$ ; Slope = 1.2<br>(0.6 – 1.8) |
| Jantzen, 2021 [53] – PRS <sub>77 SNPs</sub> | c-index     | 0.608 (0.530 – 0.685) | E/O = 0.83 (0.65 – 1.08)<br>$P = 0.0984$ ; Slope = 0.9<br>(0.4 – 1.4) |
| Jantzen, 2021 [53] – PRS <sub>86 SNPs</sub> | c-index     | 0.626 (0.545 – 0.706) | E/O = 0.81 (0.63 – 1.05)<br>$P = 0.1009$ ; Slope = 0.7<br>(0.4 – 1.8) |
| Jia, 2020 [75]                              | AUC         | 0.628 (0.620 – 0.637) | NA                                                                    |
| Lakeman, 2020 [24] – <60                    | c-statistic | 0.632 (0.580 – 0.690) | NA                                                                    |
| Lakeman, 2020 [24] – 60 to 70               | c-statistic | 0.673 (0.610 – 0.730) | NA                                                                    |
| Lakeman, 2020 [24] – $\geq 70$              | c-statistic | 0.562 (0.480 – 0.620) | NA                                                                    |
| Liu, 2021a [74] – PRS <sub>313 SNPs</sub>   | AUC         | 0.590 (0.580 – 0.600) | NA                                                                    |
| Liu, 2021a [74] – PRS <sub>3,820 SNPs</sub> | AUC         | 0.600 (0.590 – 0.610) | NA                                                                    |
| Liu, 2021a [74] – PRS <sub>5,218 SNPs</sub> | AUC         | 0.610 (0.600 – 0.620) | NA                                                                    |
| Liu, 2021b [74] – PRS <sub>34 SNPs</sub>    | AUC         | 0.520 (0.480 – 0.550) | NA                                                                    |
| Liu, 2021b [74] – PRS <sub>75 SNPs</sub>    | AUC         | 0.500 (0.470 – 0.540) | NA                                                                    |
| Liu, 2021c [74] – PRS <sub>71 SNPs</sub>    | AUC         | 0.480 (0.430 – 0.530) | NA                                                                    |
| Liu, 2021c [74] – PRS <sub>180 SNPs</sub>   | AUC         | 0.540 (0.470 – 0.620) | NA                                                                    |
| Maas, 2016 [55]                             | AUC         | 0.623 (NA)            | NA                                                                    |
| Mavaddat, 2015 [56]                         | c-statistic | 0.622 (0.619 – 0.627) | NA                                                                    |
| Mavaddat, 2019a [12] – Overall BC           | AUC         | 0.612 (NA)            | NA                                                                    |
| PRS <sub>77</sub>                           |             |                       |                                                                       |
| Mavaddat, 2019a [12] – Overall BC           | AUC         | 0.639 (NA)            | NA                                                                    |
| PRS <sub>313</sub>                          |             |                       |                                                                       |
| Mavaddat, 2019a [12] – Overall BC           | AUC         | 0.646 (NA)            | NA                                                                    |
| PRS <sub>3,820</sub>                        |             |                       |                                                                       |
| Mavaddat, 2019a [12] –                      | AUC         | 0.623 (NA)            | NA                                                                    |
| ER-positive PRS <sub>77</sub>               |             |                       |                                                                       |

|                                                                         |       |                       |                                                        |                                                    |
|-------------------------------------------------------------------------|-------|-----------------------|--------------------------------------------------------|----------------------------------------------------|
| Mavaddat, 2019a [12] – ER-positive PRS <sub>313</sub>                   | AUC   | 0.651(NA)             | NA                                                     |                                                    |
| Mavaddat, 2019a [12] – ER-positive PRS <sub>3,820</sub>                 | AUC   | 0.659 (NA)            | NA                                                     |                                                    |
| Mavaddat, 2019a [12] – ER-negative PRS <sub>77</sub>                    | AUC   | 0.596 (NA)            | NA                                                     |                                                    |
| Mavaddat, 2019a [12] – ER-negative PRS <sub>313</sub>                   | AUC   | 0.611 (NA)            | NA                                                     |                                                    |
| Mavaddat, 2019a [12] – ER-negative PRS <sub>3,820</sub>                 | AUC   | 0.611 (NA)            | NA                                                     |                                                    |
| Mavaddat, 2019b [12] – Overall BC PRS <sub>77</sub>                     | AUC   | 0.603 (NA)            | NA                                                     |                                                    |
| Mavaddat, 2019b [12] – Overall BC PRS <sub>313</sub>                    | AUC   | 0.630 (0.628–0.651)   | <i>P</i> < 0.05                                        |                                                    |
| Mavaddat, 2019b [12] – Overall BC PRS <sub>3,820</sub>                  | AUC   | 0.636 (NA)            | NA                                                     |                                                    |
| Mavaddat, 2019b [12] – ER-positive PRS <sub>77</sub>                    | AUC   | 0.615 (NA)            | NA                                                     |                                                    |
| Mavaddat, 2019b [12] – ER-positive PRS <sub>313</sub>                   | AUC   | 0.641 (NA)            | NA                                                     |                                                    |
| Mavaddat, 2019b [12] – ER-positive PRS <sub>3,820</sub>                 | AUC   | 0.647 (NA)            | NA                                                     |                                                    |
| Mavaddat, 2019b [12] – ER-negative PRS <sub>77</sub>                    | AUC   | 0.584 (NA)            | NA                                                     |                                                    |
| Mavaddat, 2019b [12] – ER-negative PRS <sub>313</sub>                   | AUC   | 0.601 (NA)            | NA                                                     |                                                    |
| Mavaddat, 2019b [12] – ER-negative PRS <sub>3,820</sub>                 | AUC   | 0.600 (NA)            | NA                                                     |                                                    |
| Mealiffe, 2010 [57] – Overall BC                                        | AUC   | 0.587 (0.567 – 0.607) | <i>P</i> = 0.18                                        |                                                    |
| Mealiffe, 2010 [57] – ER-positive                                       | AUC   | 0.593 (0.572 – 0.614) | NA                                                     |                                                    |
| Mealiffe, 2010 [57] – ER-negative                                       | AUC   | 0.541 (0.496 – 0.583) | NA                                                     |                                                    |
| Shieh, 2016a [59]                                                       | AUROC | 0.600 (0.570 – 0.640) | <i>x</i> <sup>2</sup> = 975.7, <i>P</i> = 0.42         |                                                    |
| Shieh, 2016b [59]                                                       | AUROC | 0.590 (0.560 – 0.630) | NA                                                     |                                                    |
| Shieh, 2016c [59] – PRS <sub>76</sub> SNPs                              | AUROC | 0.640 (0.530 – 0.740) | NA                                                     |                                                    |
| Shieh, 2016c [59] – PRS <sub>83</sub> SNPs                              | AUROC | 0.620 (0.520 – 0.730) | NA                                                     |                                                    |
| Shieh, 2017 [60]                                                        | AUC   | 0.680 (0.610 – 0.750) | NA                                                     |                                                    |
| Starlard-Davenport, 2018 [61]                                           | AUC   | 0.581 (0.541 – 0.620) | NA                                                     |                                                    |
| Vachon, 2015 [63]                                                       | AUC   | 0.676 (NA)            | NA                                                     |                                                    |
| Wen, 2016 [64]                                                          | AUC   | 0.606 (NA)            | NA                                                     |                                                    |
| Yang X., 2022 [23]                                                      | AUC   | 0.670 (0.640 – 0.690) | E/O = 1.06 (0.99 – 1.15)<br>Slope = 1.02 (1.00 – 1.03) |                                                    |
| Yang Y., 2022a [72] – PRS <sub>111</sub> SNPs                           | AUC   | 0.603 (0.582 – 0.624) | NA                                                     |                                                    |
| Yang Y., 2022a [72] – PRS <sub>263</sub> SNPs                           | AUC   | 0.600 (0.579 – 0.621) | NA                                                     |                                                    |
| Yang Y., 2022b [72] – PRS <sub>111</sub> SNPs                           | AUC   | 0.639 (0.604 – 0.674) | NA                                                     |                                                    |
| Yang Y., 2022b [72] – PRS <sub>263</sub> SNPs                           | AUC   | 0.626 (0.592 – 0.661) | NA                                                     |                                                    |
| Models based on genetic risk factors and clinical or other risk factors |       |                       |                                                        |                                                    |
| Allman, 2015c [43]                                                      | AUC   | 0.590 (0.560 – 0.610) | <i>x</i> <sup>2</sup> = 9.9, <i>P</i> = 0.3            | NRI <sup>0.015, 0.02</sup> = 0.033 (0.025 – 0.089) |
| Allman, 2015d [43]                                                      | AUC   | 0.550 (0.520 – 0.580) | <i>x</i> <sup>2</sup> = 6.9, <i>P</i> = 0.5            | NRI <sup>0.015, 0.02</sup> = 0.060 (0.005 – 0.113) |

|                                                        |                    |                       |                              |                                                                         |
|--------------------------------------------------------|--------------------|-----------------------|------------------------------|-------------------------------------------------------------------------|
| Allman, 2015e [43]                                     | AUC                | 0.610 (0.560 – 0.660) | $\chi^2 = 4.7, P = 0.8$      | $\text{NRI}^{0.015, 0.02} = 0.082 (0.003 – 0.162)$                      |
| Allman, 2015f [43]                                     | AUC                | 0.590 (0.540 – 0.640) | $\chi^2 = 3.9, P = 0.9$      | $\text{NRI}^{0.015, 0.02} = 0.181 (0.085 – 0.273)$                      |
| Allman, 2021a [44]                                     | AUC                | 0.570 (0.539 – 0.601) | NA                           | NA                                                                      |
| Allman, 2021b [44]                                     | AUC                | 0.639 (0.606 – 0.672) | NA                           | NA                                                                      |
| Allman, 2021c [44]                                     | AUC                | 0.601 (0.554 – 0.647) | NA                           | NA                                                                      |
| Brentnall, 2020 [45] – Overall BC                      | aAUC               | 0.640 (0.610 – 0.670) | O/E = 1.06 (0.82 – 1.29)     | NA                                                                      |
| Brentnall, 2020 [45] – ER-positive                     | aAUC               | 0.650 (0.620 – 0.680) | O/E = 1.09 (0.84 – 1.34)     | NA                                                                      |
| Brentnall, 2020 [45] – ER-negative                     | aAUC               | 0.630 (0.540 – 0.710) | O/E = 0.87 (0.21 – 1.53)     | NA                                                                      |
| Darabi, 2012b [46]                                     | AUC                | 0.619 (0.594 – 0.644) | $\chi^2 = 22.82, P = 0.0036$ | $\text{NRI}_e^{0.02, 0.04} = 0.170, Z = 5.750; P = 8.93 \times 10^{-9}$ |
| Dite, 2013 [47] – Overall BC (All ages)                | AUC                | 0.610 (0.580 – 0.640) | $\chi^2 = 6.25, P = 0.6$     | $\text{NRI}^{0.015, 0.02} = 0.028, P = 0.5$                             |
| Dite, 2013 [47] – Overall BC (35 to 39)                | AUC                | 0.650 (0.600 – 0.700) | $\chi^2 = 7.74, P = 0.5$     | $\text{NRI}^{0.015, 0.02} = 0.021, P = 0.4$                             |
| Dite, 2013 [47] – Overall BC (40 to 49)                | AUC                | 0.630 (0.570 – 0.690) | $\chi^2 = 14.81, P = 0.06$   | $\text{NRI}^{0.015, 0.02} = 0.074, P = 0.4$                             |
| Dite, 2013 [47] – Overall BC (50 to 59)                | AUC                | 0.560 (0.510 – 0.620) | $\chi^2 = 4.45, P = 0.8$     | $\text{NRI}^{0.015, 0.02} = -0.029, P = 0.5$                            |
| Dite, 2013 [47] – ER-positive                          | AUC                | 0.610 (0.570 – 0.650) | NA                           | NA                                                                      |
| Dite, 2013 [47] – ER-negative                          | AUC                | 0.550 (0.490 – 0.590) | NA                           | NA                                                                      |
| Dite, 2016a [48]                                       | AUC                | 0.700 (0.670 – 0.730) | $\chi^2 = 9.9, P = 0.3$      | $\text{NRI}^{0.015, 0.02} = 0.040 (0.007 – 0.073)$                      |
| Dite, 2016b [48]                                       | AUC                | 0.690 (0.660 – 0.720) | $\chi^2 = 8.9, P = 0.4$      | $\text{NRI}^{0.015, 0.02} = 0.063 (0.030 – 0.094)$                      |
| Dite, 2016c [48]                                       | AUC                | 0.670 (0.630 – 0.700) | $\chi^2 = 7.0, P = 0.5$      | $\text{NRI}^{0.015, 0.02} = 0.066 (0.019 – 0.110)$                      |
| Dite, 2016d [48]                                       | AUC                | 0.630 (0.590 – 0.660) | $\chi^2 = 7.2, P = 0.5$      | $\text{NRI}^{0.015, 0.02} = 0.052 (0.015 – 0.088)$                      |
| Erickson, 2020 [66]                                    | AUC                | 0.770 (0.750 – 0.790) | NA                           | NA                                                                      |
| Evans, 2022 [69] – PRS <sub>18</sub>                   | AUC                | 0.634 (0.602 – 0.667) | NA                           | NA                                                                      |
| Evans, 2022 [69] – PRS <sub>143</sub>                  | AUC                | 0.684 (0.652 – 0.715) | NA                           | NA                                                                      |
| Evans, 2022 [69] – PRS <sub>313</sub>                  | AUC                | 0.672 (0.641 – 0.704) | NA                           | NA                                                                      |
| Hou, 2022b [70] – Overall BC                           | AUC                | 0.596 (0.557 – 0.635) | E/O = 1.17 (0.62 – 1.72)     | NA                                                                      |
| Hou, 2022b [70] – ER-positive                          | AUC                | 0.614 (0.571 – 0.657) | E/O = 1.12 (0.65 – 1.59)     | NA                                                                      |
| Hou, 2022b [70] – ER-negative                          | AUC                | 0.555 (0.496 – 0.614) | E/O = 1.15 (0.41 – 1.89)     | NA                                                                      |
| Hou, 2022c [70] – Overall BC                           | AUC                | 0.600 (0.561 – 0.639) | E/O = 1.13 (0.83–1.42)       | NA                                                                      |
| Hou, 2022c [70] – ER-positive                          | AUC                | 0.619 (0.576 – 0.662) | E/O = 1.11 (0.74–1.48)       | NA                                                                      |
| Hou, 2022c [70] – ER-negative                          | AUC                | 0.556 (0.497 – 0.615) | E/O = 1.11 (0.00–2.22)       | NA                                                                      |
| Hurson, 2021 [51] – <50                                | AUC                | 0.640 (0.620 – 0.660) | $\chi^2 = 18.3, P = 0.03$    | Reclassification <sup>0.03</sup> (USA) = 12.3% of future cases          |
| Hurson, 2021 [51] – ≥50                                | AUC                | 0.640 (0.632 – 0.647) | $\chi^2 = 42.5, P < 0.01$    | Reclassification <sup>0.03</sup> (UK) = 15.7% of future cases           |
| Husing, 2012 [52] – PRS <sub>7 SNPs</sub>              | AUROC <sub>a</sub> | 0.591 (0.574 – 0.608) | NA                           | NA                                                                      |
| Husing, 2012 [52] – PRS <sub>9 SNPs</sub>              | AUROC <sub>a</sub> | 0.595 (0.579 – 0.612) | NA                           | NA                                                                      |
| Husing, 2012 [52] – Overall BC PRS <sub>18 SNPs</sub>  | AUROC <sub>a</sub> | 0.605 (0.589 – 0.622) | NA                           | $\text{NRI} = 8.3\%$                                                    |
| Husing, 2012 [52] – ER-positive PRS <sub>18 SNPs</sub> | AUROC <sub>a</sub> | 0.618 (0.596 – 0.639) | NA                           | NA                                                                      |
| Husing, 2012 [52] – ER-negative PRS <sub>18 SNPs</sub> | AUROC <sub>a</sub> | 0.554 (0.517 – 0.591) | NA                           | NA                                                                      |



|                                                           |                    |                       |                                                                          |                                                                                         |
|-----------------------------------------------------------|--------------------|-----------------------|--------------------------------------------------------------------------|-----------------------------------------------------------------------------------------|
| Husing, 2012 [52] – Overall BC<br>PRS <sub>32</sub> SNPs  | AUROC <sub>a</sub> | 0.604 (0.588 – 0.621) | NA                                                                       | NA                                                                                      |
| Husing, 2012 [52] – ER-positive<br>PRS <sub>32</sub> SNPs | AUROC <sub>a</sub> | 0.618 (0.596 – 0.639) | NA                                                                       | NA                                                                                      |
| Husing, 2012 [52] – ER-negative<br>PRS <sub>32</sub> SNPs | AUROC <sub>a</sub> | 0.554 (0.517 – 0.591) | NA                                                                       | NA                                                                                      |
| Jantzen, 2021a [53] – PRS <sub>10</sub> SNPs              | C-index            | 0.636 (0.575 – 0.697) | E/O = 0.82 (0.64 – 1.06)<br><i>P</i> = 0.048; Slope = 0.7<br>(0.2 – 1.1) | NA                                                                                      |
| Jantzen, 2021a [53] – PRS <sub>18</sub> SNPs              | C-index            | 0.627 (0.559 – 0.695) | E/O = 0.83 (0.64 – 1.08)<br><i>P</i> = 0.047; Slope = 0.7<br>(0.3 – 1.1) | NA                                                                                      |
| Jantzen, 2021a [53] – PRS <sub>77</sub> SNPs              | C-index            | 0.614 (0.541 – 0.688) | E/O = 0.83 (0.64 – 1.07)<br><i>P</i> = 0.161; Slope = 0.6<br>(0.2 – 1.0) | NA                                                                                      |
| Jantzen, 2021a [53] – PRS <sub>86</sub> SNPs              | C-index            | 0.634 (0.559 – 0.695) | E/O = 0.86 (0.66 – 1.11)<br><i>P</i> = 0.130; Slope = 0.6<br>(0.2 – 1.0) | NA                                                                                      |
| Jantzen, 2021b [53] – PRS <sub>10</sub> SNPs              | C-index            | 0.642 (0.579 – 0.705) | E/O = 0.94 (0.73 – 1.22)<br><i>P</i> = 0.627; Slope = 0.9<br>(0.4 – 1.3) | NA                                                                                      |
| Jantzen, 2021b [53] – PRS <sub>18</sub> SNPs              | C-index            | 0.634 (0.564 – 0.703) | E/O = 0.94 (0.73 – 1.22)<br><i>P</i> = 0.993; Slope = 0.9<br>(0.4 – 1.4) | NA                                                                                      |
| Jantzen, 2021b [53] – PRS <sub>77</sub> SNPs              | C-index            | 0.627 (0.553 – 0.701) | E/O = 0.94 (0.73 – 1.22)<br><i>P</i> = 0.470; Slope = 0.8<br>(0.4 – 1.2) | NA                                                                                      |
| Jantzen, 2021b [53] – PRS <sub>86</sub> SNPs              | C-index            | 0.638 (0.564 – 0.703) | E/O = 0.95 (0.73 – 1.22)<br><i>P</i> = 0.519; Slope = 0.8<br>(0.4 – 1.2) | NA                                                                                      |
| Jia, 2020 [75]                                            | AUC                | 0.633 (0.624 – 0.641) | NA                                                                       | NA                                                                                      |
| Lakeman, 2020 [24]                                        | c-statistic        | 0.653 (0.600 – 0.700) | Calibration plots                                                        | NA                                                                                      |
| Lee, 2015 [54]                                            | AUC                | 0.680 (0.660 – 0.690) | NA                                                                       | NA                                                                                      |
| Li, 2021a [73] – 5 year-risk                              | c-statistic        | 0.640 (0.610 – 0.670) | E/O = 0.87 (0.76 – 1.00)                                                 | NA                                                                                      |
| Li, 2021a [73] – <65                                      | c-statistic        | 0.660 (0.620 – 0.690) | E/O = 0.97 (0.81 – 1.17)                                                 | NA                                                                                      |
| Li, 2021a [73] – ≥65                                      | c-statistic        | 0.600 (0.560 – 0.650) | E/O = 0.75 (0.62 – 0.92)                                                 | NA                                                                                      |
| Li, 2021a [73] – 10-year risk                             | c-statistic        | 0.620 (0.590 – 0.640) | E/O = 0.85 (0.77 – 0.94)                                                 | NA                                                                                      |
| Li, 2021a [73] – <65                                      | c-statistic        | 0.650 (0.620 – 0.680) | E/O = 0.94 (0.82 – 1.07)                                                 | NA                                                                                      |
| Li, 2021a [73] – ≥65                                      | c-statistic        | 0.580 (0.530 – 0.620) | E/O = 0.73 (0.63 – 0.85)                                                 | NA                                                                                      |
| Li, 2021b [73] – 5 year-risk                              | c-statistic        | 0.630 (0.600 – 0.660) | E/O = 1.05 (0.91 – 1.20)                                                 | NA                                                                                      |
| Li, 2021b [73] – <65                                      | c-statistic        | 0.640 (0.610 – 0.680) | E/O = 1.07 (0.89 – 1.30)                                                 | NA                                                                                      |
| Li, 2021b [73] – ≥65                                      | c-statistic        | 0.620 (0.570 – 0.670) | E/O = 1.02 (0.83 – 1.25)                                                 | NA                                                                                      |
| Li, 2021b [73] – 10-year risk                             | c-statistic        | 0.620 (0.600 – 0.650) | E/O = 1.06 (0.95 – 1.17)                                                 | NA                                                                                      |
| Li, 2021b [73] – <65                                      | c-statistic        | 0.640 (0.600 – 0.670) | E/O = 1.09 (0.95 – 1.25)                                                 | NA                                                                                      |
| Li, 2021b [73] – ≥65                                      | c-statistic        | 0.600 (0.550 – 0.650) | E/O = 1.01 (0.86 – 1.18)                                                 | NA                                                                                      |
| Maas, 2016 [55]                                           | AUC                | 0.648 (NA)            | NA                                                                       | NA                                                                                      |
| Mealiffe, 2010 [57] – Overall BC                          | AUC                | 0.594 (0.575 – 0.612) | <i>P</i> = 0.003                                                         | NR <sup>0.015, 0.02</sup> = 0.085, <i>Z</i> = 4.3;<br><i>P</i> = 1.0 × 10 <sup>-5</sup> |
| Mealiffe, 2010 [57] – ER-positive                         | AUC                | 0.605 (0.583 – 0.625) | NA                                                                       | NA                                                                                      |
| Mealiffe, 2010 [57] – ER-negative                         | AUC                | 0.521 (0.478 – 0.567) | NA                                                                       | NA                                                                                      |
| Olsen, 2021 [71] – 3-year risk                            | AUC                | 0.720 (0.675 – 0.765) | Calibration plots                                                        | NR <sup>0.01</sup> = 0.09 (0.02 – 0.16),<br><i>p</i> = 0.01                             |

|                                               |             |                       |                                                                                     |                                                                                              |
|-----------------------------------------------|-------------|-----------------------|-------------------------------------------------------------------------------------|----------------------------------------------------------------------------------------------|
| Olsen, 2021 [71] – 5-year risk                | AUC         | 0.704 (0.670 – 0.737) | Calibration plots                                                                   | $\text{NRI}^{0.01} = 0.05 (0.02 – 0.12),$<br>$p = 0.17$                                      |
| Pal Choudhury, 2020a [58] – <50               | AUC         | 0.654 (0.621 – 0.687) | E/O = 0.98 (0.87 – 1.11)                                                            | NA                                                                                           |
| Pal Choudhury, 2020a [58] – ≥50               | AUC         | 0.622 (0.600 – 0.645) | E/O = 1.13 (1.04 – 1.22)                                                            | NA                                                                                           |
| Pal Choudhury, 2020b [58] – ≥50               | AUC         | 0.602 (0.580 – 0.624) | E/O = 1.00 (0.93 – 1.09)                                                            | NA                                                                                           |
| Pal Choudhury, 2020c [58] – <50               | AUC         | 0.640 (0.606 – 0.674) | E/O = 0.85 (0.75 – 0.95)                                                            | NA                                                                                           |
| Pal Choudhury, 2020c [58] – ≥50               | AUC         | 0.582 (0.558 – 0.605) | E/O = 0.95 (0.88 – 1.03)                                                            | NA                                                                                           |
| Pal Choudhury, 2020d [58] – <50               | AUC         | 0.646 (0.613 – 0.679) | E/O = 1.14 (1.01 – 1.29)                                                            | NA                                                                                           |
| Pal Choudhury, 2020d [58] – ≥50               | AUC         | 0.614 (0.592 – 0.636) | E/O = 1.13 (1.05 – 1.23)                                                            | NA                                                                                           |
| Pal Choudhury, 2021a [25] – <50               | AUC         | 0.697 (0.641 – 0.752) | E/O = 0.79 (0.64 – 0.98)<br>$\chi^2 = 17.8, P = 0.04$<br>Slope = 0.92 (0.56 – 1.29) | NA                                                                                           |
| Pal Choudhury, 2021a [25] – ≥50               | AUC         | 0.646 (0.609 – 0.682) | E/O = 0.88 (0.77 – 1.00)<br>$\chi^2 = 15.5, P = 0.08$<br>Slope = 0.90 (0.57 – 1.24) | NA                                                                                           |
| Pal Choudhury, 2021b [25] – <50               | AUC         | 0.694 (0.638 – 0.750) | E/O = 1.11 (0.90 – 1.38)<br>$\chi^2 = 23.3, P = 0.01$<br>Slope = 0.58 (0.36 – 0.81) | NA                                                                                           |
| Pal Choudhury, 2021b [25] – ≥50               | AUC         | 0.639 (0.602 – 0.676) | E/O = 1.18 (1.04 – 1.35)<br>$\chi^2 = 57.9, P < 0.01$<br>Slope = 0.45 (0.16 – 0.73) | NA                                                                                           |
| Shieh, 2016a [59]                             | AUC         | 0.650 (0.610 – 0.680) | $\chi^2 = 937.0, P = 0.41$                                                          | NA                                                                                           |
| Shieh, 2016b [59]                             | AUC         | 0.630 (0.590 – 0.670) | NA                                                                                  | NA                                                                                           |
| Shieh, 2016c [59]                             | AUC         | 0.720 (0.620 – 0.820) | NA                                                                                  | NA                                                                                           |
| Shieh, 2017 [60]                              | AUC         | 0.720 (0.650 – 0.790) | NA                                                                                  | NA                                                                                           |
| Starlard-Davenport, 2018 [61] – 5-year risk   | AUC         | 0.679 (0.642 – 0.716) | NA                                                                                  | $\text{NRI}^{0.017} = 0.020 (-0.040 – 0.080)$                                                |
| Starlard-Davenport, 2018 [61] – Lifetime risk | AUC         | 0.658 (0.619 – 0.696) | NA                                                                                  | $\text{NRI}^{0.2} = 0.034 (0.000 – 0.070)$                                                   |
| Vachon, 2015 [63]                             | AUC         | 0.690 (0.640 – 0.730) | NA                                                                                  | $\text{NRI}_e^{0.03} = 0.11 (0.07 – 0.15)$<br>$\text{NRI}_{ne}^{0.03} = 0.02 (-0.01 – 0.05)$ |
| van Veen, 2018 [62]                           | AUC         | 0.670 (0.620 – 0.710) | E/O = 0.98 (0.69 – 1.28)                                                            | NA                                                                                           |
| Yang X, 2022 [23]                             | AUC         | 0.700 (0.660 – 0.730) | E/O = 0.88 (0.75 – 1.04)<br>Slope = 0.97 (0.95 – 0.99)                              | Reclassification table at 3% threshold                                                       |
| Yang Y., 2022b [72] – PRS <sub>111</sub> SNPs | AUC         | 0.648 (0.613 – 0.682) | NA                                                                                  | NA                                                                                           |
| Yang Y., 2022b [72] – PRS <sub>263</sub> SNPs | AUC         | 0.632 (0.597 – 0.666) | NA                                                                                  | NA                                                                                           |
| Zheng, 2010 [65]                              | c-statistic | 0.630 (NA)            | NA                                                                                  | Reclassification table at 1.5% threshold                                                     |

**Notes:**  $\chi^2$  = Chi-square goodness-of-fit-test statistics;  $P$  = goodness-of-fit p-value;  $Z$  = asymptomatic Z-test testing the null hypothesis that the net reclassification improvement is equal to 0.

**Abbreviations:** aAUC : Area under the adjusted receiver operating characteristic; AUC: Area under the receiver operating characteristic curve; AUROC<sub>a</sub> : Covariate-adjusted area under the receiver operating characteristic curve; c-statistics : concordance statistics E/O = expected to observed ratio; NA: Information not available; NRI: Net reclassification improvement;  $\text{NRI}_e$  = Net proportion index for events;  $\text{NRI}_{ne}$  = Net proportion index for non-events; PRS-CSx : Extension of the Bayesian polygenic prediction method (<https://github.com/getian107/PRSCsx>)
